# Supplementary material for: Roles and regulation of autophagy and apoptosis in the remodelling of the lepidopteran midgut epithelium during metamorphosis
Source: PubMed Central journal article supplement (PMC5016986; doi:10.1038/srep32939), 2016-09-09
Supplement: srep32939-s1.pdf [file srep32939-s1.pdf]

**Roles and regulation of autophagy and apoptosis in the remodelling of the lepidopteran midgut epithelium during metamorphosis**

Davide Romanelli, Morena Casartelli, Silvia Cappelozza, Magda de Eguileor, and Gianluca Tettamanti



## **Supplementary Figure S2 - RNAi-mediated inhibition of autophagy.**

### *A) Generation of dsRNA and administration protocol*

dsRNA was generated by using T7 RiboMAX™ Express RNAi System (Promega, P1700). RNA quality and integrity were assessed by electrophoresis prior to administration to the larvae.

Different conditions were assayed for dsRNA administration:

- Administration procedure (oral administration, injection into the haemocoel, injection into the haemocoel followed by electroporation)
- Stage of administration (larval stage, larva-pupa transition)
- Number of doses administered (1-6)
- Target gene (*BmATG1*, *BmATG8*)
- Amount of dsRNA (100 ng-50 µg)

Electroporation of the larvae was performed just after injecting dsRNA, by using an electric pulse generator (ECM 830, BTX, Holliston, MA, USA). The protocol was modified from Thomas<sup>1</sup>.

### *B) Results*

The RNAi-mediated silencing approach did not succeed in giving a strong and reproducible reduction of gene expression in larvae treated with dsRNA. A nonsignificant decrease in gene expression was observed when dsRNA was injected into the haemocoel (procedure followed or not by electroporation) (a, b). Electroporation of the larvae after dsRNA injection slightly increased the efficiency of the silencing, but this treatment led to high levels of mortality.

Unfortunately, these results are in accordance with previous and current studies on Lepidoptera, where a high variability of success in gene silencing by RNAi has been recorded, the results are conflicting, and, conversely to other insect species, a standard procedure has not been established yet<sup>2,3</sup>.

a

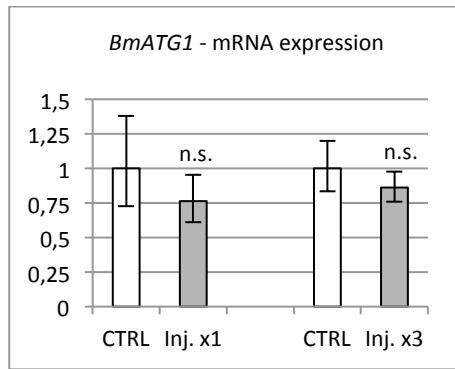

b

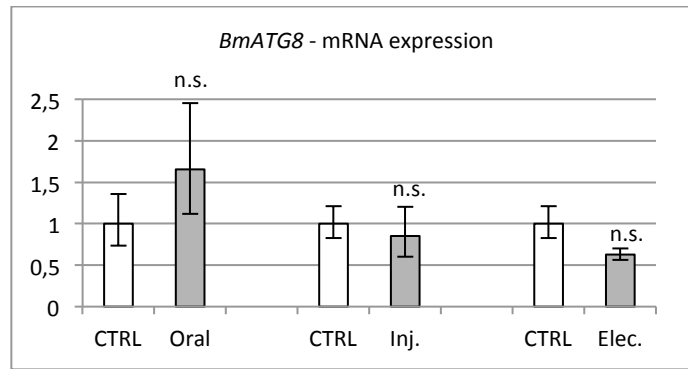

(a, b) Gene expression levels in representative RNAi experiments showing no significant difference among the treatments. (a) *BmATG1* expression 24 h following a single (Inj. ×1) or multiple injections (Inj. ×3) of *BmATG1* dsRNA during the feeding larval stage; (b) *BmATG8* expression 24 h after oral administration (Oral), injection (Inj.) or injection of dsRNA followed by electroporation (Elec.) in larvae at wandering stage.

### References

1. Thomas, J.L. Electroporation, an alternative to biolistics for transfection of *Bombyx mori* embryos and larval tissues. *J. Insect Sci.* **3**, 17-28 (2003).
2. Terenius, O. *et al.* RNA interference in Lepidoptera: an overview of successful and unsuccessful studies and implications for experimental design. *J. Insect Physiol.* **57**, 231-245 (2010).
3. Kolliopoulou, A. & Swevers, L. Recent progress in RNAi research in Lepidoptera: intracellular machinery, antiviral immune response and prospects for insect pest control. *Curr. Opin. Insect Sci.* **6**, 28-34 (2014).

**Supplementary Figure S3 - Evaluation of z.vad.fmk-mediated caspase inhibition.**

(a) Dose-dependent inhibition of BmCaspase-1 activation obtained by treatment with z.vad.fmk at SD2 stage; (b) effect of z.vad.fmk administration at SD1 stage (25 $\mu$ g) on BmCaspase-1 activation.

**a**

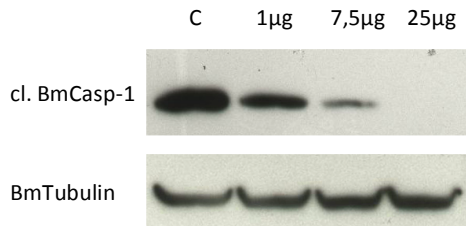

**b**

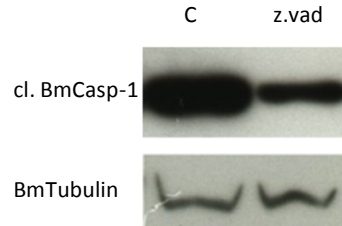

**Supplementary Figure S4 - qRT-PCR analysis of *BmIAP2* and *BmIBM1* mRNA levels.**

*BmIAP2* (a) and *BmIBM1* (b) mRNA expression levels in the silkworm midgut during metamorphosis. Values represent mean  $\pm$  s.e.m.

a

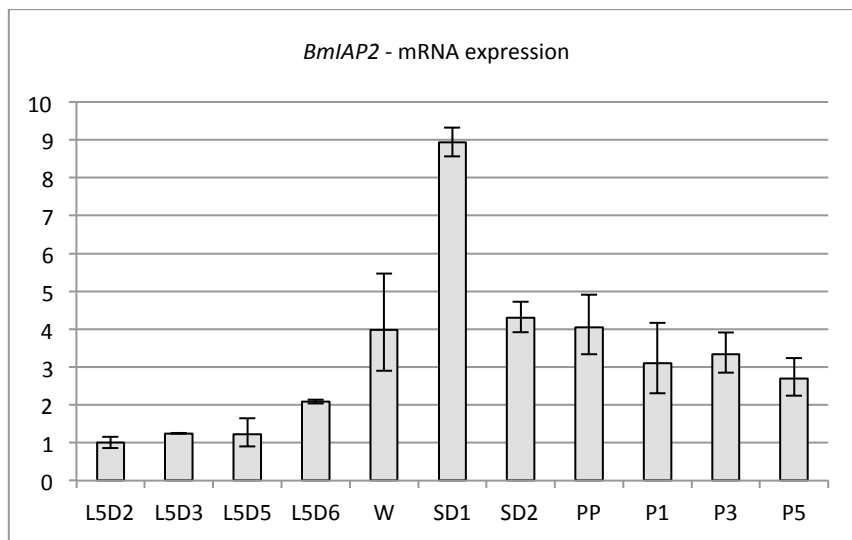

b

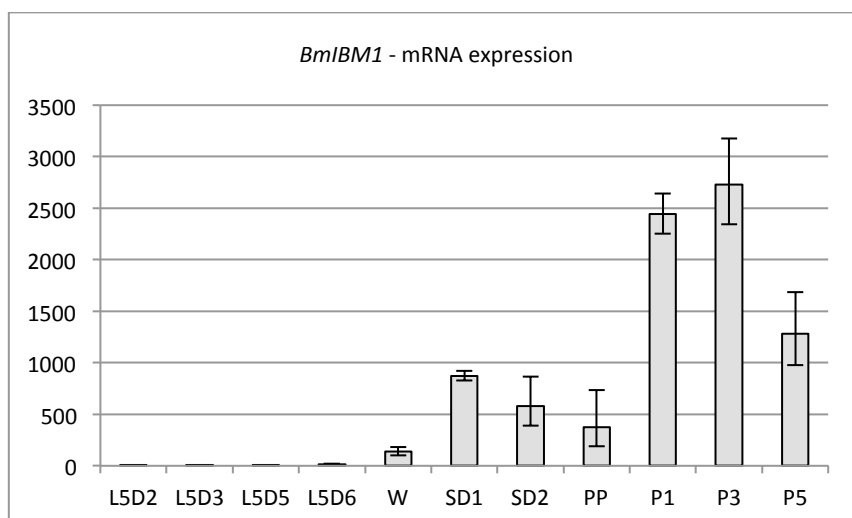

**Supplementary Table S5 - Definition and description of developmental stages of the silkworm, *B. mori*, used in this study.**

| <b>Stage</b>  | <b>Definition</b>                  | <b>Larval Features</b>                                                       | <b>Midgut description</b>                                                                                                             |
|---------------|------------------------------------|------------------------------------------------------------------------------|---------------------------------------------------------------------------------------------------------------------------------------|
| L5D1-<br>L5D6 | Fifth larval instar<br>day 1–day 6 | The larva actively feeds                                                     | The larval midgut epithelium is well-organized                                                                                        |
| W             | Wandering stage                    | The larva stops feeding;<br>spinneret pigmentation and<br>gut purging occurs | The larval midgut epithelium is well-organized; stem<br>cells start to proliferate                                                    |
| SD1           | Spinning stage<br>day 1            | The larva starts spinning the<br>cocoon                                      | The larval midgut epithelium starts to degenerate;<br>stem cells proliferate                                                          |
| SD2           | Spinning stage<br>day 2            | Cocoon spinning is<br>completed                                              | The larval midgut epithelium detaches from the pupal<br>epithelium; active formation of the new pupal<br>epithelium                   |
| PP            | Prepupal stage                     | The transition from larva to<br>pupa occurs                                  | The larval midgut epithelium is shed into the lumen<br>(yellow body); the new pupal epithelium continues to<br>grow and differentiate |
| P1-P9         | Pupal stage<br>day 1–day 9         | Pupa                                                                         | Yellow body is actively degraded; the new pupal<br>epithelium differentiates into the adult midgut                                    |

**Supplementary Table S6 - Primer sequences used in this study.**

| <b>Gene Name</b>   | <b>Accession number</b> | <b>Primers sequence</b>                                   |
|--------------------|-------------------------|-----------------------------------------------------------|
| <i>BmATG1</i>      | NM_001309546.1          | F: CCCCGCCTATGTCTATGTTG<br>R: ATCTGATGGGTGGGAGTACG        |
| <i>BmATG8</i>      | NM_001046779.1          | F: CCAGATCGCGTTCCTGTAAT<br>R: GAGACCCCATTGTTGCAGAT        |
| <i>BmCASPASE-1</i> | NM_001043585            | F: GCCTGTCGAAAGATACGCTC<br>R: CACAGCAACCAGCAGACAAT        |
| <i>BmCASPASE-5</i> | NM_001195467.1          | F: TCGCCATCCCGTGCTTTC<br>R: GTTGACCCCGTCCCTGTTG           |
| <i>BmRP49</i>      | NM_001098282.1          | F: AGGCATCAATCGGATCGCTATG<br>R: TTGTGAACTAGGACCTTACGGAATC |
| <i>BmIAP2</i>      | NM_001202529.1          | F: CCACCAGAGACAGGCAATGA<br>R: GCCGCTGACAACACCTAAC         |
| <i>BmIBM1</i>      | NM_001166341.1          | F: GCATAGCAGATGGAGACTGT<br>R: TTCTAACCGTGCCCTAACCA        |
